# Supplementary material for: Oncocytoma-Related Gene Signature to Differentiate Chromophobe Renal Cancer and Oncocytoma Using Machine Learning
Source: MDPI journal article supplement (doi:10.3390/cells11020287), 2022-01-15
Supplement: s1 [file s1]

**Table S1:** Micro-array and RNA-Seq data sets used in the study and the web links to access them.

| <b>Study</b> | <b>Access Links</b>                                                                                                                                                                                                                                                                                                                                                   | <b>Date Accessed</b> |
|--------------|-----------------------------------------------------------------------------------------------------------------------------------------------------------------------------------------------------------------------------------------------------------------------------------------------------------------------------------------------------------------------|----------------------|
| GSE11024     | <a href="https://www.ncbi.nlm.nih.gov/geo/query/acc.cgi?acc=GSE11024">https://www.ncbi.nlm.nih.gov/geo/query/acc.cgi?acc=GSE11024</a>                                                                                                                                                                                                                                 | 6/6/2021             |
| GSE11151     | <a href="https://www.ncbi.nlm.nih.gov/geo/query/acc.cgi?acc=GSE11151">https://www.ncbi.nlm.nih.gov/geo/query/acc.cgi?acc=GSE11151</a>                                                                                                                                                                                                                                 | 6/6/2021             |
| GSE19982     | <a href="https://www.ncbi.nlm.nih.gov/geo/query/acc.cgi?acc=GSE19982">https://www.ncbi.nlm.nih.gov/geo/query/acc.cgi?acc=GSE19982</a>                                                                                                                                                                                                                                 | 6/6/2021             |
| GSE8271      | <a href="https://www.ncbi.nlm.nih.gov/geo/query/acc.cgi?acc=GSE8271">https://www.ncbi.nlm.nih.gov/geo/query/acc.cgi?acc=GSE8271</a>                                                                                                                                                                                                                                   | 6/6/2021             |
| GSE2109      | <a href="https://www.ncbi.nlm.nih.gov/geo/query/acc.cgi?acc=GSE2109">https://www.ncbi.nlm.nih.gov/geo/query/acc.cgi?acc=GSE2109</a>                                                                                                                                                                                                                                   | 6/6/2021             |
| GSE12090     | <a href="https://www.ncbi.nlm.nih.gov/geo/query/acc.cgi?acc=GSE12090">https://www.ncbi.nlm.nih.gov/geo/query/acc.cgi?acc=GSE12090</a>                                                                                                                                                                                                                                 | 6/6/2021             |
| TCGA-KICH    | <a href="https://xenabrowser.net/datapages/?dataset=TCGA-KICH.htseq_fpkm-ug.tsv&amp;host=https%3A%2F%2Fgdc.xenahubs.net&amp;removeHub=https%3A%2F%2Fxcna.treehouse.gi.ucsc.edu%3A443">https://xenabrowser.net/datapages/?dataset=TCGA-KICH.htseq_fpkm-ug.tsv&amp;host=https%3A%2F%2Fgdc.xenahubs.net&amp;removeHub=https%3A%2F%2Fxcna.treehouse.gi.ucsc.edu%3A443</a> | 6/6/2021             |

**Table S2:** List of top 194 differentially expressed genes between chRCC and RO.

| Probe ID    | SYMBOL    | ENTREZ | logFC | AveExpr | t      | P.Value  | adj.P.Val | B     | AUC.x | optimal_cutp | sum_sens | sp acc | sensitivity | specificity |
|-------------|-----------|--------|-------|---------|--------|----------|-----------|-------|-------|--------------|----------|--------|-------------|-------------|
| 1552797_s_a | PROM2     | 150696 | -1.35 | 7.67    | -11.83 | 7.63E-20 | 2.74E-18  | 34.62 | 0.98  | 7.76         | 1.83     | 0.90   | 0.83        | 1.00        |
| 1552897_a_a | KCNG3     | 170850 | 1.01  | 5.41    | 15.11  | 4.14E-26 | 5.31E-24  | 48.96 | 1.00  | 5.49         | 2.00     | 1.00   | 1.00        | 1.00        |
| 1557137_at  | TMEM17    | 200728 | 1.30  | 6.18    | 15.60  | 5.21E-27 | 8.09E-25  | 51.02 | 0.99  | 6.07         | 1.94     | 0.98   | 0.94        | 1.00        |
| 1557146_a_a | SSTR5-AS1 | 146336 | 1.25  | 7.62    | 10.50  | 3.71E-17 | 8.53E-16  | 28.47 | 0.96  | 7.42         | 1.78     | 0.89   | 0.89        | 0.89        |
| 200662_s_at | TOMM20    | 9804   | 1.00  | 10.20   | 11.93  | 4.88E-20 | 1.82E-18  | 35.06 | 0.95  | 10.26        | 1.85     | 0.93   | 0.89        | 0.96        |
| 200978_at   | MDH1      | 4190   | 1.07  | 11.82   | 14.83  | 1.35E-25 | 1.50E-23  | 47.79 | 1.00  | 11.93        | 1.98     | 0.99   | 1.00        | 0.98        |
| 201141_at   | GNPMB     | 10457  | -3.04 | 10.16   | -12.05 | 2.77E-20 | 1.08E-18  | 35.63 | 0.95  | 9.61         | 1.83     | 0.92   | 0.94        | 0.89        |
| 201212_at   | LGMN      | 5641   | -1.15 | 11.21   | -9.55  | 3.15E-15 | 5.18E-14  | 24.05 | 0.91  | 10.95        | 1.73     | 0.87   | 0.89        | 0.83        |
| 201502_s_at | NFKBIA    | 4792   | -1.45 | 10.75   | -10.05 | 3.04E-16 | 6.01E-15  | 26.37 | 0.93  | 10.83        | 1.73     | 0.86   | 0.79        | 0.94        |
| 201619_at   | PRDX3     | 10935  | 1.43  | 11.28   | 16.70  | 5.94E-29 | 1.50E-26  | 55.46 | 1.00  | 11.59        | 1.95     | 0.98   | 0.97        | 0.98        |
| 201721_s_at | LAPTM5    | 7805   | -1.02 | 9.21    | -10.41 | 5.57E-17 | 1.24E-15  | 28.06 | 0.94  | 8.85         | 1.81     | 0.92   | 1.00        | 0.81        |
| 201843_s_at | EFEMP1    | 2202   | 2.70  | 8.93    | 15.77  | 2.59E-27 | 4.37E-25  | 51.72 | 0.98  | 9.59         | 1.87     | 0.94   | 0.89        | 0.98        |
| 201849_at   | BNIP3     | 664    | 1.06  | 9.90    | 13.11  | 2.36E-22 | 1.38E-20  | 40.36 | 0.98  | 9.83         | 1.91     | 0.95   | 1.00        | 0.91        |
| 202432_at   | PPP3CB    | 5532   | 1.21  | 9.32    | 15.20  | 2.77E-26 | 3.71E-24  | 49.36 | 0.98  | 9.39         | 1.90     | 0.95   | 0.92        | 0.98        |
| 202502_at   | ACADM     | 34     | 1.78  | 10.43   | 14.14  | 2.55E-24 | 2.29E-22  | 44.87 | 0.97  | 10.55        | 1.90     | 0.95   | 0.94        | 0.96        |
| 202525_at   | PRSS8     | 5652   | -2.75 | 9.52    | -16.21 | 4.33E-28 | 8.82E-26  | 53.49 | 0.99  | 9.66         | 1.90     | 0.95   | 0.96        | 0.94        |
| 202749_at   | GET1      | 7485   | 1.26  | 8.85    | 10.00  | 3.87E-16 | 7.46E-15  | 26.14 | 0.92  | 9.03         | 1.76     | 0.89   | 0.78        | 0.98        |
| 202826_at   | SPINT1    | 6692   | -2.03 | 9.86    | -16.45 | 1.64E-28 | 3.89E-26  | 54.46 | 0.99  | 9.98         | 1.95     | 0.98   | 0.98        | 0.97        |
| 202930_s_at | SUCLA2    | 8803   | 1.35  | 9.63    | 17.13  | 1.10E-29 | 3.30E-27  | 57.13 | 1.00  | 9.71         | 1.98     | 0.99   | 1.00        | 0.98        |
| 202962_at   | KIF13B    | 23303  | -1.30 | 10.31   | -16.89 | 2.82E-29 | 7.73E-27  | 56.20 | 1.00  | 10.32        | 1.95     | 0.98   | 0.98        | 0.97        |
| 203138_at   | HAT1      | 8520   | 1.14  | 8.21    | 9.58   | 2.80E-15 | 4.65E-14  | 24.17 | 0.94  | 8.29         | 1.75     | 0.88   | 0.86        | 0.89        |
| 203196_at   | ABCC4     | 10257  | 1.54  | 7.49    | 15.72  | 3.18E-27 | 5.27E-25  | 51.51 | 0.99  | 7.93         | 1.94     | 0.98   | 0.94        | 1.00        |
| 203303_at   | DYNLT3    | 6990   | 1.49  | 10.98   | 12.44  | 4.70E-21 | 2.11E-19  | 37.39 | 0.97  | 11.29        | 1.91     | 0.95   | 0.97        | 0.94        |
| 203474_at   | IQGAP2    | 10788  | -1.02 | 8.91    | -8.86  | 8.36E-14 | 1.11E-12  | 20.80 | 0.91  | 8.79         | 1.77     | 0.89   | 0.94        | 0.83        |
| 203476_at   | TPBG      | 7162   | -1.49 | 9.11    | -10.87 | 6.51E-18 | 1.69E-16  | 30.20 | 0.94  | 9.31         | 1.77     | 0.88   | 0.85        | 0.92        |
| 203608_at   | ALDH5A1   | 7915   | 1.21  | 7.73    | 11.52  | 3.11E-19 | 1.01E-17  | 33.22 | 0.96  | 7.71         | 1.85     | 0.92   | 1.00        | 0.85        |
| 203711_s_at | HIBCH     | 26275  | 1.14  | 9.35    | 8.37   | 8.33E-13 | 9.34E-12  | 18.52 | 0.90  | 9.59         | 1.70     | 0.86   | 0.81        | 0.89        |
| 203717_at   | DPP4      | 1803   | 1.78  | 8.50    | 9.89   | 6.42E-16 | 1.19E-14  | 25.63 | 0.91  | 8.83         | 1.86     | 0.94   | 0.86        | 1.00        |
| 203860_at   | PCCA      | 5095   | 1.11  | 10.92   | 9.57   | 2.90E-15 | 4.79E-14  | 24.13 | 0.94  | 10.80        | 1.82     | 0.90   | 0.97        | 0.85        |
| 203881_s_at | DMD       | 1756   | 1.21  | 7.29    | 10.06  | 2.93E-16 | 5.81E-15  | 26.41 | 0.93  | 7.33         | 1.75     | 0.88   | 0.86        | 0.89        |
| 203892_at   | WFDC2     | 10406  | -1.34 | 6.96    | -12.29 | 9.48E-21 | 3.94E-19  | 36.69 | 0.97  | 6.99         | 1.82     | 0.90   | 0.87        | 0.94        |
| 204037_at   | LPAR1     | 1902   | 1.07  | 8.19    | 12.46  | 4.39E-21 | 1.97E-19  | 37.46 | 0.97  | 8.17         | 1.87     | 0.94   | 0.92        | 0.96        |
| 204122_at   | TYROBP    | 7305   | -1.02 | 8.46    | -10.09 | 2.51E-16 | 5.01E-15  | 26.56 | 0.95  | 8.27         | 1.78     | 0.89   | 0.91        | 0.86        |
| 204254_s_at | VDR       | 7421   | -1.24 | 8.45    | -15.39 | 1.29E-26 | 1.87E-24  | 50.12 | 0.99  | 8.35         | 1.96     | 0.98   | 0.96        | 1.00        |
| 204273_at   | EDNRB     | 1910   | 1.24  | 7.99    | 9.82   | 8.81E-16 | 1.60E-14  | 25.32 | 0.94  | 8.16         | 1.74     | 0.87   | 0.89        | 0.85        |
| 204286_s_at | PMAIP1    | 5366   | -1.43 | 6.06    | -8.91  | 6.71E-14 | 9.03E-13  | 21.01 | 0.93  | 5.73         | 1.83     | 0.92   | 0.94        | 0.89        |
| 204485_s_at | TOM1L1    | 10040  | 1.36  | 9.09    | 13.06  | 3.00E-22 | 1.73E-20  | 40.13 | 0.98  | 9.42         | 1.90     | 0.95   | 0.94        | 0.96        |
| 204627_s_at | ITGB3     | 3690   | 1.29  | 6.91    | 15.20  | 2.81E-26 | 3.71E-24  | 49.35 | 1.00  | 6.79         | 1.98     | 0.99   | 1.00        | 0.98        |
| 204653_at   | TFAP2A    | 7020   | -1.22 | 6.65    | -9.65  | 1.97E-15 | 3.35E-14  | 24.52 | 0.90  | 6.47         | 1.69     | 0.86   | 0.94        | 0.75        |
| 204675_at   | SRD5A1    | 6715   | -1.04 | 6.96    | -12.73 | 1.28E-21 | 6.61E-20  | 38.69 | 0.98  | 6.83         | 1.91     | 0.95   | 0.94        | 0.97        |
| 204719_at   | ABCA8     | 10351  | 2.94  | 7.05    | 13.31  | 9.59E-23 | 6.09E-21  | 41.26 | 0.96  | 7.29         | 1.86     | 0.93   | 0.94        | 0.91        |
| 204821_at   | BTN3A3    | 10384  | 1.01  | 6.51    | 10.41  | 5.59E-17 | 1.24E-15  | 28.06 | 0.96  | 6.56         | 1.84     | 0.93   | 0.86        | 0.98        |
| 204849_at   | TCFL5     | 10732  | 1.28  | 7.60    | 10.10  | 2.37E-16 | 4.75E-15  | 26.62 | 0.94  | 7.75         | 1.80     | 0.90   | 0.89        | 0.91        |
| 205075_at   | SERPINF2  | 5345   | 1.40  | 8.60    | 9.75   | 1.26E-15 | 2.21E-14  | 24.96 | 0.91  | 8.90         | 1.70     | 0.87   | 0.72        | 0.98        |
| 205139_s_at | UST       | 10090  | 1.26  | 7.23    | 8.65   | 2.26E-13 | 2.78E-12  | 19.81 | 0.90  | 7.42         | 1.71     | 0.86   | 0.83        | 0.87        |
| 205173_x_at | CD58      | 965    | 1.23  | 7.62    | 10.13  | 2.08E-16 | 4.24E-15  | 26.75 | 0.94  | 7.65         | 1.75     | 0.88   | 0.86        | 0.89        |

|             |           |        |       |       |        |          |          |       |      |       |      |      |      |      |
|-------------|-----------|--------|-------|-------|--------|----------|----------|-------|------|-------|------|------|------|------|
| 205200_at   | CLEC3B    | 7123   | 1.95  | 9.97  | 9.37   | 7.48E-15 | 1.16E-13 | 23.19 | 0.90 | 11.21 | 1.67 | 0.86 | 0.67 | 1.00 |
| 205202_at   | PCMT1     | 5110   | 1.04  | 9.23  | 16.28  | 3.31E-28 | 6.92E-26 | 53.76 | 0.99 | 9.33  | 1.95 | 0.98 | 0.97 | 0.98 |
| 205302_at   | IGFBP1    | 3484   | 3.42  | 5.55  | 11.21  | 1.36E-18 | 4.02E-17 | 31.76 | 0.94 | 4.60  | 1.77 | 0.87 | 1.00 | 0.77 |
| 205334_at   | S100A1    | 6271   | 1.25  | 8.53  | 11.72  | 1.24E-19 | 4.32E-18 | 34.13 | 0.97 | 8.43  | 1.91 | 0.95 | 1.00 | 0.91 |
| 205352_at   | SERPINI1  | 5274   | -1.27 | 8.80  | -8.70  | 1.80E-13 | 2.25E-12 | 20.04 | 0.90 | 8.64  | 1.85 | 0.93 | 0.96 | 0.89 |
| 205549_at   | PCP4      | 5121   | -2.40 | 9.88  | -8.99  | 4.56E-14 | 6.26E-13 | 21.40 | 0.91 | 8.93  | 1.74 | 0.88 | 0.96 | 0.78 |
| 205573_s_at | SNX7      | 51375  | 1.39  | 8.59  | 12.83  | 8.28E-22 | 4.44E-20 | 39.12 | 0.97 | 8.54  | 1.82 | 0.90 | 0.94 | 0.87 |
| 205590_at   | RASGRP1   | 10125  | -1.66 | 7.14  | -10.10 | 2.36E-16 | 4.74E-15 | 26.63 | 0.94 | 7.03  | 1.79 | 0.89 | 0.87 | 0.92 |
| 205609_at   | ANGPT1    | 284    | -1.37 | 8.31  | -9.76  | 1.21E-15 | 2.13E-14 | 25.01 | 0.94 | 8.51  | 1.80 | 0.89 | 0.85 | 0.94 |
| 205632_s_at | PIP5K1B   | 8395   | -1.12 | 7.68  | -10.32 | 8.49E-17 | 1.83E-15 | 27.64 | 0.91 | 7.52  | 1.81 | 0.92 | 1.00 | 0.81 |
| 205799_s_at | SLC3A1    | 6519   | 2.26  | 11.28 | 9.19   | 1.77E-14 | 2.58E-13 | 22.34 | 0.94 | 11.59 | 1.90 | 0.95 | 0.94 | 0.96 |
| 205857_at   | SLC18A2   | 6571   | 1.77  | 5.94  | 11.08  | 2.41E-18 | 6.82E-17 | 31.18 | 0.95 | 5.86  | 1.84 | 0.92 | 0.94 | 0.89 |
| 206307_s_at | FOXD1     | 2297   | 2.13  | 7.05  | 9.12   | 2.45E-14 | 3.48E-13 | 22.01 | 0.90 | 7.05  | 1.75 | 0.87 | 0.94 | 0.81 |
| 206529_x_at | SLC26A4   | 5172   | -1.51 | 6.07  | -7.10  | 3.07E-10 | 2.31E-09 | 12.67 | 0.90 | 5.81  | 1.73 | 0.86 | 0.79 | 0.94 |
| 206632_s_at | APOBEC3B  | 9582   | -1.01 | 5.80  | -8.69  | 1.86E-13 | 2.32E-12 | 20.00 | 0.91 | 5.53  | 1.68 | 0.84 | 0.87 | 0.81 |
| 206683_at   | ZNF165    | 7718   | -1.78 | 6.75  | -11.81 | 8.38E-20 | 2.98E-18 | 34.52 | 0.94 | 6.26  | 1.84 | 0.93 | 0.98 | 0.86 |
| 207177_at   | PTGFR     | 5737   | 2.38  | 5.67  | 11.01  | 3.34E-18 | 9.22E-17 | 30.86 | 0.94 | 5.75  | 1.74 | 0.88 | 0.78 | 0.96 |
| 207198_s_at | LIMS1     | 3987   | 1.17  | 10.17 | 10.58  | 2.48E-17 | 5.84E-16 | 28.87 | 0.96 | 10.35 | 1.88 | 0.94 | 0.94 | 0.94 |
| 207655_s_at | BLNK      | 29760  | 1.08  | 10.07 | 9.64   | 2.07E-15 | 3.49E-14 | 24.47 | 0.93 | 10.20 | 1.73 | 0.87 | 0.86 | 0.87 |
| 208190_s_at | LSR       | 51599  | -1.21 | 8.77  | -22.33 | 6.74E-38 | 2.14E-34 | 75.83 | 1.00 | 8.72  | 2.00 | 1.00 | 1.00 | 1.00 |
| 208383_s_at | PCK1      | 5105   | 3.74  | 10.14 | 9.42   | 5.99E-15 | 9.41E-14 | 23.41 | 0.90 | 12.01 | 1.70 | 0.87 | 0.72 | 0.98 |
| 208671_at   | SERINC1   | 57515  | 1.33  | 10.62 | 14.39  | 8.65E-25 | 8.58E-23 | 45.94 | 0.99 | 10.75 | 1.93 | 0.96 | 0.97 | 0.96 |
| 209016_s_at | KRT7      | 3855   | -4.00 | 8.56  | -16.97 | 2.09E-29 | 5.94E-27 | 56.50 | 0.99 | 7.72  | 1.94 | 0.96 | 0.94 | 1.00 |
| 209183_s_at | DEPP1     | 11067  | 1.02  | 8.54  | 9.66   | 1.93E-15 | 3.28E-14 | 24.54 | 0.92 | 8.89  | 1.70 | 0.87 | 0.72 | 0.98 |
| 209406_at   | BAG2      | 9532   | 1.08  | 5.47  | 12.03  | 3.02E-20 | 1.16E-18 | 35.54 | 0.98 | 5.54  | 1.87 | 0.94 | 0.92 | 0.96 |
| 209421_at   | MSH2      | 4436   | 1.28  | 6.44  | 19.51  | 1.31E-33 | 1.16E-30 | 66.08 | 1.00 | 6.54  | 1.98 | 0.99 | 1.00 | 0.98 |
| 209465_x_at | PTN       | 5764   | -1.78 | 8.65  | -9.44  | 5.31E-15 | 8.40E-14 | 23.53 | 0.95 | 8.15  | 1.85 | 0.93 | 0.94 | 0.92 |
| 209602_s_at | GATA3     | 2625   | -2.04 | 6.92  | -9.50  | 4.08E-15 | 6.57E-14 | 23.79 | 0.93 | 7.05  | 1.73 | 0.86 | 0.79 | 0.94 |
| 209619_at   | CD74      | 972    | -1.53 | 11.31 | -11.30 | 8.62E-19 | 2.62E-17 | 32.21 | 0.94 | 10.93 | 1.78 | 0.90 | 0.98 | 0.81 |
| 209956_s_at | CAMK2B    | 816    | -1.30 | 6.47  | -9.55  | 3.26E-15 | 5.35E-14 | 24.02 | 0.95 | 6.44  | 1.87 | 0.93 | 0.89 | 0.97 |
| 210001_s_at | SOCS1     | 8651   | -1.24 | 7.47  | -11.93 | 4.79E-20 | 1.79E-18 | 35.08 | 0.96 | 7.32  | 1.83 | 0.92 | 0.91 | 0.92 |
| 210108_at   | CACNA1D   | 776    | -1.00 | 7.25  | -9.78  | 1.08E-15 | 1.93E-14 | 25.11 | 0.94 | 6.85  | 1.76 | 0.89 | 0.96 | 0.81 |
| 210715_s_at | SPINT2    | 10653  | -1.23 | 10.56 | -18.80 | 1.78E-32 | 1.09E-29 | 63.50 | 1.00 | 10.59 | 2.00 | 1.00 | 1.00 | 1.00 |
| 211990_at   | HLA-DPA1  | 3113   | -1.46 | 10.71 | -9.18  | 1.85E-14 | 2.68E-13 | 22.29 | 0.92 | 10.56 | 1.79 | 0.89 | 0.87 | 0.92 |
| 212070_at   | ADGRG1    | 9289   | -1.17 | 11.06 | -12.31 | 8.66E-21 | 3.62E-19 | 36.78 | 0.96 | 11.22 | 1.84 | 0.92 | 0.87 | 0.97 |
| 212163_at   | KIDINS220 | 57498  | 1.06  | 8.99  | 18.44  | 7.01E-32 | 3.97E-29 | 62.15 | 1.00 | 9.19  | 2.00 | 1.00 | 1.00 | 1.00 |
| 212453_at   | KIFBP     | 26128  | 1.00  | 8.63  | 15.50  | 8.13E-27 | 1.19E-24 | 50.58 | 1.00 | 8.81  | 1.96 | 0.98 | 1.00 | 0.96 |
| 212503_s_at | DIP2C     | 22982  | 1.20  | 8.78  | 14.33  | 1.12E-24 | 1.08E-22 | 45.69 | 0.98 | 8.66  | 1.88 | 0.94 | 0.94 | 0.94 |
| 212818_s_at | ASB1      | 51665  | 1.70  | 6.69  | 11.31  | 8.31E-19 | 2.54E-17 | 32.24 | 0.94 | 6.79  | 1.81 | 0.92 | 0.83 | 0.98 |
| 212950_at   | ADGRF5    | 221395 | 1.67  | 11.56 | 7.80   | 1.22E-11 | 1.14E-10 | 15.86 | 0.90 | 12.38 | 1.76 | 0.89 | 0.81 | 0.96 |
| 213085_s_at | WWC1      | 23286  | -1.54 | 8.95  | -9.95  | 4.80E-16 | 9.13E-15 | 25.92 | 0.91 | 8.88  | 1.77 | 0.89 | 0.94 | 0.83 |
| 213172_at   | TTC9      | 23508  | 1.58  | 6.45  | 8.99   | 4.56E-14 | 6.26E-13 | 21.40 | 0.91 | 6.24  | 1.63 | 0.81 | 0.89 | 0.74 |
| 213285_at   | TMEM30B   | 161291 | -3.50 | 8.66  | -14.96 | 7.60E-26 | 9.14E-24 | 48.36 | 0.97 | 8.98  | 1.82 | 0.92 | 0.96 | 0.86 |
| 213309_at   | PLCL2     | 23228  | -1.68 | 7.83  | -16.11 | 6.57E-28 | 1.32E-25 | 53.08 | 1.00 | 7.79  | 1.96 | 0.98 | 0.96 | 1.00 |
| 213624_at   | SMPDL3A   | 10924  | 1.30  | 8.96  | 10.17  | 1.69E-16 | 3.47E-15 | 26.96 | 0.94 | 9.17  | 1.83 | 0.92 | 0.92 | 0.91 |
| 213929_at   | EXPH5     | 23086  | -1.20 | 9.51  | -9.27  | 1.20E-14 | 1.80E-13 | 22.72 | 0.91 | 9.28  | 1.69 | 0.86 | 0.94 | 0.75 |
| 214043_at   | PTPRD     | 5789   | -1.12 | 7.68  | -7.63  | 2.72E-11 | 2.40E-10 | 15.07 | 0.90 | 7.19  | 1.71 | 0.87 | 0.94 | 0.78 |
| 214079_at   | DHRS2     | 10202  | -3.30 | 7.54  | -8.76  | 1.37E-13 | 1.75E-12 | 20.31 | 0.95 | 6.55  | 1.84 | 0.92 | 0.89 | 0.94 |

|             |          |        |       |       |        |          |          |       |      |       |      |      |      |      |
|-------------|----------|--------|-------|-------|--------|----------|----------|-------|------|-------|------|------|------|------|
| 214214_s_at | C1QBP    | 708    | 1.17  | 9.41  | 13.38  | 7.28E-23 | 4.77E-21 | 41.54 | 0.98 | 9.62  | 1.86 | 0.93 | 0.94 | 0.91 |
| 214598_at   | CLDN8    | 9073   | -3.70 | 9.77  | -13.00 | 3.77E-22 | 2.11E-20 | 39.90 | 0.97 | 10.50 | 1.86 | 0.93 | 0.91 | 0.94 |
| 216219_at   | AQP6     | 363    | 3.49  | 7.95  | 18.03  | 3.33E-31 | 1.47E-28 | 60.60 | 0.99 | 8.29  | 1.94 | 0.98 | 0.94 | 1.00 |
| 216834_at   | RGS1     | 5996   | -1.51 | 6.33  | -10.23 | 1.29E-16 | 2.69E-15 | 27.23 | 0.94 | 6.15  | 1.73 | 0.87 | 0.87 | 0.86 |
| 217127_at   | CTH      | 1491   | 1.48  | 6.23  | 11.11  | 2.09E-18 | 5.99E-17 | 31.32 | 0.93 | 6.07  | 1.82 | 0.92 | 0.86 | 0.96 |
| 217989_at   | HSD17B11 | 51170  | 1.77  | 8.38  | 9.78   | 1.07E-15 | 1.91E-14 | 25.12 | 0.93 | 8.22  | 1.76 | 0.87 | 0.97 | 0.79 |
| 218025_s_at | ECI2     | 10455  | 1.15  | 10.29 | 10.89  | 5.78E-18 | 1.52E-16 | 30.31 | 0.96 | 10.72 | 1.84 | 0.93 | 0.86 | 0.98 |
| 218113_at   | CEMIP2   | 23670  | -1.24 | 8.96  | -11.26 | 1.04E-18 | 3.11E-17 | 32.02 | 0.95 | 8.68  | 1.89 | 0.95 | 1.00 | 0.89 |
| 218186_at   | RAB25    | 57111  | -1.97 | 8.53  | -10.79 | 9.52E-18 | 2.41E-16 | 29.82 | 0.91 | 8.16  | 1.78 | 0.90 | 1.00 | 0.78 |
| 218191_s_at | LMBRD1   | 55788  | 1.08  | 10.87 | 9.97   | 4.44E-16 | 8.50E-15 | 26.00 | 0.95 | 10.87 | 1.80 | 0.89 | 0.94 | 0.85 |
| 218311_at   | MAP4K3   | 8491   | 1.66  | 8.71  | 19.79  | 4.61E-34 | 4.88E-31 | 67.12 | 1.00 | 8.91  | 2.00 | 1.00 | 1.00 | 1.00 |
| 218404_at   | SNX10    | 29887  | 1.30  | 8.85  | 10.55  | 2.90E-17 | 6.76E-16 | 28.71 | 0.96 | 9.08  | 1.81 | 0.90 | 0.92 | 0.89 |
| 218559_s_at | MAFB     | 9935   | -1.06 | 9.03  | -9.31  | 1.00E-14 | 1.53E-13 | 22.90 | 0.92 | 8.75  | 1.72 | 0.87 | 0.91 | 0.81 |
| 218717_s_at | P3H2     | 55214  | -1.50 | 9.55  | -13.41 | 6.34E-23 | 4.19E-21 | 41.67 | 0.98 | 9.49  | 1.91 | 0.95 | 0.91 | 1.00 |
| 218723_s_at | RGCC     | 28984  | 1.59  | 9.68  | 9.40   | 6.53E-15 | 1.02E-13 | 23.33 | 0.94 | 9.90  | 1.80 | 0.89 | 0.94 | 0.85 |
| 218780_at   | HOOK2    | 29911  | -1.34 | 9.46  | -25.08 | 1.02E-41 | 5.42E-38 | 84.46 | 1.00 | 9.42  | 2.00 | 1.00 | 1.00 | 1.00 |
| 218792_s_at | BSPRY    | 54836  | -1.25 | 7.83  | -17.63 | 1.52E-30 | 6.02E-28 | 59.10 | 1.00 | 7.82  | 2.00 | 1.00 | 1.00 | 1.00 |
| 218910_at   | ANO10    | 55129  | -1.42 | 9.71  | -14.54 | 4.64E-25 | 4.79E-23 | 46.56 | 0.99 | 9.71  | 1.91 | 0.95 | 0.94 | 0.97 |
| 218921_at   | SIGIRR   | 59307  | -1.89 | 8.88  | -14.72 | 2.17E-25 | 2.36E-23 | 47.32 | 0.99 | 8.87  | 1.93 | 0.96 | 0.96 | 0.97 |
| 218946_at   | NFU1     | 27247  | 1.09  | 8.58  | 12.61  | 2.24E-21 | 1.10E-19 | 38.13 | 0.98 | 8.67  | 1.90 | 0.95 | 0.94 | 0.96 |
| 218980_at   | FHOD3    | 80206  | -1.02 | 9.81  | -9.89  | 6.29E-16 | 1.17E-14 | 25.65 | 0.93 | 9.69  | 1.83 | 0.92 | 0.94 | 0.89 |
| 219179_at   | DACT1    | 51339  | -1.51 | 7.06  | -11.04 | 2.87E-18 | 8.00E-17 | 31.01 | 0.93 | 7.06  | 1.80 | 0.90 | 0.91 | 0.89 |
| 219196_at   | SCG3     | 29106  | -1.48 | 5.39  | -6.48  | 5.20E-09 | 3.22E-08 | 9.88  | 0.96 | 5.03  | 1.85 | 0.92 | 0.85 | 1.00 |
| 219305_x_at | FBXO2    | 26232  | -1.06 | 7.69  | -12.64 | 1.95E-21 | 9.62E-20 | 38.27 | 0.97 | 7.54  | 1.92 | 0.96 | 0.98 | 0.94 |
| 219382_at   | SERTAD3  | 29946  | -1.05 | 8.87  | -17.94 | 4.59E-31 | 1.97E-28 | 60.29 | 0.99 | 8.73  | 1.94 | 0.98 | 1.00 | 0.94 |
| 219388_at   | GRHL2    | 79977  | -1.02 | 6.77  | -9.81  | 9.35E-16 | 1.69E-14 | 25.26 | 0.94 | 6.84  | 1.82 | 0.90 | 0.85 | 0.97 |
| 219411_at   | ELMO3    | 79767  | -1.13 | 7.97  | -18.83 | 1.58E-32 | 1.01E-29 | 63.62 | 1.00 | 7.86  | 2.00 | 1.00 | 1.00 | 1.00 |
| 219440_at   | RAI2     | 10742  | -1.05 | 9.02  | -14.88 | 1.10E-25 | 1.27E-23 | 47.99 | 0.98 | 8.96  | 1.89 | 0.94 | 0.91 | 0.97 |
| 219474_at   | C3orf52  | 79669  | -1.11 | 7.16  | -10.11 | 2.30E-16 | 4.64E-15 | 26.65 | 0.92 | 6.76  | 1.71 | 0.87 | 0.94 | 0.78 |
| 219580_s_at | TMC5     | 79838  | -1.72 | 5.58  | -17.23 | 7.25E-30 | 2.26E-27 | 57.55 | 1.00 | 5.21  | 2.00 | 1.00 | 1.00 | 1.00 |
| 219732_at   | PLPPR1   | 54886  | 2.35  | 7.64  | 16.28  | 3.28E-28 | 6.92E-26 | 53.77 | 1.00 | 8.05  | 2.00 | 1.00 | 1.00 | 1.00 |
| 219786_at   | TESMIN   | 9633   | -1.22 | 7.53  | -12.24 | 1.19E-20 | 4.84E-19 | 36.47 | 0.97 | 7.44  | 1.85 | 0.93 | 0.94 | 0.92 |
| 219949_at   | LRRC2    | 79442  | 1.47  | 5.59  | 11.40  | 5.52E-19 | 1.73E-17 | 32.65 | 0.94 | 5.74  | 1.80 | 0.90 | 0.89 | 0.91 |
| 221547_at   | PRPF18   | 8559   | 1.01  | 7.47  | 12.38  | 6.12E-21 | 2.67E-19 | 37.13 | 0.98 | 7.57  | 1.85 | 0.93 | 0.89 | 0.96 |
| 221823_at   | MACIR    | 90355  | -1.62 | 8.43  | -14.75 | 1.91E-25 | 2.10E-23 | 47.44 | 0.98 | 8.33  | 1.92 | 0.96 | 0.98 | 0.94 |
| 221880_s_at | FAM174B  | 400451 | -1.09 | 7.00  | -8.46  | 5.61E-13 | 6.47E-12 | 18.91 | 0.95 | 6.58  | 1.86 | 0.94 | 1.00 | 0.86 |
| 222014_x_at | MTO1     | 25821  | 1.06  | 7.93  | 13.64  | 2.30E-23 | 1.65E-21 | 42.68 | 0.99 | 7.91  | 1.94 | 0.96 | 1.00 | 0.94 |
| 222243_s_at | TOB2     | 10766  | -1.00 | 8.59  | -10.08 | 2.56E-16 | 5.11E-15 | 26.54 | 0.96 | 8.52  | 1.79 | 0.89 | 0.87 | 0.92 |
| 222574_s_at | DHX40    | 79665  | 1.06  | 8.50  | 10.43  | 4.95E-17 | 1.12E-15 | 28.18 | 0.94 | 8.55  | 1.82 | 0.90 | 0.97 | 0.85 |
| 222805_at   | MANEA    | 79694  | 1.12  | 5.55  | 19.00  | 8.45E-33 | 6.39E-30 | 64.24 | 1.00 | 5.70  | 1.98 | 0.99 | 1.00 | 0.98 |
| 222984_at   | PAIP2    | 51247  | 1.04  | 9.86  | 9.21   | 1.57E-14 | 2.31E-13 | 22.46 | 0.91 | 9.84  | 1.73 | 0.87 | 0.86 | 0.87 |
| 223087_at   | ECHDC1   | 55862  | 1.08  | 8.88  | 10.17  | 1.70E-16 | 3.48E-15 | 26.95 | 0.95 | 8.91  | 1.76 | 0.88 | 0.89 | 0.87 |
| 223170_at   | TMEM98   | 26022  | 1.15  | 9.22  | 10.93  | 4.83E-18 | 1.29E-16 | 30.49 | 0.94 | 9.32  | 1.87 | 0.94 | 0.92 | 0.96 |
| 223343_at   | MS4A7    | 58475  | -1.50 | 7.81  | -13.77 | 1.30E-23 | 9.84E-22 | 43.25 | 1.00 | 7.51  | 1.98 | 0.99 | 0.98 | 1.00 |
| 223748_at   | SLC4A11  | 83959  | -1.10 | 7.13  | -13.16 | 1.90E-22 | 1.12E-20 | 40.58 | 0.96 | 6.90  | 1.92 | 0.96 | 0.98 | 0.94 |
| 224650_at   | MAL2     | 114569 | -3.48 | 9.50  | -12.35 | 7.25E-21 | 3.07E-19 | 36.96 | 0.95 | 9.76  | 1.79 | 0.90 | 0.96 | 0.83 |
| 225065_x_at | SNHG29   | 125144 | 1.26  | 10.86 | 16.43  | 1.77E-28 | 4.06E-26 | 54.38 | 0.99 | 10.85 | 1.93 | 0.96 | 0.97 | 0.96 |
| 225291_at   | PNPT1    | 87178  | 1.01  | 8.20  | 21.85  | 3.38E-37 | 8.95E-34 | 74.24 | 1.00 | 8.38  | 2.00 | 1.00 | 1.00 | 1.00 |

|             |         |        |       |      |        |          |          |       |      |       |      |      |      |      |
|-------------|---------|--------|-------|------|--------|----------|----------|-------|------|-------|------|------|------|------|
| 225353_s_at | C1QC    | 714    | -1.03 | 8.88 | -8.79  | 1.14E-13 | 1.48E-12 | 20.49 | 0.93 | 8.62  | 1.79 | 0.90 | 0.96 | 0.83 |
| 225835_at   | SLC12A2 | 6558   | -1.09 | 7.99 | -10.94 | 4.74E-18 | 1.27E-16 | 30.51 | 0.97 | 7.92  | 1.91 | 0.95 | 0.94 | 0.97 |
| 225846_at   | ESRP1   | 54845  | -2.28 | 7.75 | -19.80 | 4.56E-34 | 4.88E-31 | 67.13 | 1.00 | 7.99  | 1.98 | 0.99 | 0.98 | 1.00 |
| 225897_at   | MARCKS  | 4082   | 1.47  | 8.28 | 11.24  | 1.17E-18 | 3.51E-17 | 31.90 | 0.94 | 8.51  | 1.81 | 0.92 | 0.83 | 0.98 |
| 225911_at   | NPNT    | 255743 | -2.09 | 8.28 | -15.48 | 8.91E-27 | 1.30E-24 | 50.49 | 0.99 | 8.46  | 1.91 | 0.95 | 0.94 | 0.97 |
| 226068_at   | SYK     | 6850   | -1.47 | 7.28 | -13.38 | 7.24E-23 | 4.77E-21 | 41.54 | 0.98 | 7.13  | 1.87 | 0.94 | 0.98 | 0.89 |
| 226129_at   | FAM83H  | 286077 | -1.36 | 8.19 | -16.44 | 1.72E-28 | 4.02E-26 | 54.41 | 1.00 | 8.04  | 1.98 | 0.99 | 0.98 | 1.00 |
| 226185_at   | CDS1    | 1040   | -1.61 | 8.68 | -12.72 | 1.34E-21 | 6.90E-20 | 38.64 | 0.97 | 8.86  | 1.84 | 0.92 | 0.89 | 0.94 |
| 226403_at   | TMC4    | 147798 | -1.59 | 9.84 | -15.07 | 4.76E-26 | 6.00E-24 | 48.83 | 0.99 | 9.94  | 1.91 | 0.95 | 0.94 | 0.97 |
| 226748_at   | LYSMD2  | 256586 | -1.35 | 9.19 | -12.50 | 3.67E-21 | 1.69E-19 | 37.64 | 0.96 | 9.07  | 1.94 | 0.98 | 1.00 | 0.94 |
| 226824_at   | CPXM2   | 119587 | -1.74 | 8.99 | -8.73  | 1.51E-13 | 1.92E-12 | 20.21 | 0.90 | 8.10  | 1.73 | 0.88 | 0.98 | 0.75 |
| 226913_s_at | SOX8    | 30812  | 1.06  | 5.47 | 10.60  | 2.28E-17 | 5.41E-16 | 28.95 | 0.94 | 5.49  | 1.83 | 0.90 | 1.00 | 0.83 |
| 226939_at   | CPEB2   | 132864 | -1.01 | 9.27 | -13.24 | 1.31E-22 | 8.08E-21 | 40.95 | 0.97 | 9.16  | 1.81 | 0.92 | 0.98 | 0.83 |
| 227015_at   | ASPHD2  | 57168  | -1.61 | 7.38 | -12.82 | 8.42E-22 | 4.49E-20 | 39.10 | 0.96 | 7.49  | 1.80 | 0.89 | 0.85 | 0.94 |
| 227048_at   | LAMA1   | 284217 | -1.90 | 6.46 | -13.99 | 4.94E-24 | 4.06E-22 | 44.21 | 0.97 | 5.87  | 1.87 | 0.94 | 0.96 | 0.92 |
| 227291_s_at | BOLA3   | 388962 | 1.23  | 9.89 | 13.02  | 3.56E-22 | 2.01E-20 | 39.96 | 0.97 | 10.16 | 1.92 | 0.96 | 0.94 | 0.98 |
| 227471_at   | HACE1   | 57531  | 1.04  | 6.78 | 10.79  | 9.44E-18 | 2.40E-16 | 29.83 | 0.95 | 6.81  | 1.80 | 0.90 | 0.86 | 0.94 |
| 228186_s_at | RSPO3   | 84870  | -1.74 | 7.32 | -13.19 | 1.64E-22 | 9.84E-21 | 40.73 | 0.99 | 6.89  | 1.96 | 0.98 | 0.96 | 1.00 |
| 228338_at   | COLCA2  | 120376 | -1.42 | 7.95 | -10.80 | 8.90E-18 | 2.28E-16 | 29.89 | 0.95 | 7.70  | 1.89 | 0.95 | 1.00 | 0.89 |
| 228697_at   | HINT3   | 135114 | 1.00  | 5.66 | 9.93   | 5.36E-16 | 1.01E-14 | 25.81 | 0.96 | 5.48  | 1.79 | 0.88 | 1.00 | 0.79 |
| 229057_at   | SCN2A   | 6326   | 1.22  | 6.60 | 9.43   | 5.63E-15 | 8.88E-14 | 23.47 | 0.93 | 6.71  | 1.83 | 0.92 | 0.89 | 0.94 |
| 229070_at   | ADTRP   | 84830  | -1.25 | 6.91 | -12.54 | 3.08E-21 | 1.45E-19 | 37.81 | 0.97 | 6.70  | 1.87 | 0.94 | 0.98 | 0.89 |
| 229309_at   | ADRB1   | 153    | 1.89  | 5.58 | 14.50  | 5.35E-25 | 5.45E-23 | 46.42 | 1.00 | 5.95  | 1.97 | 0.99 | 0.97 | 1.00 |
| 229396_at   | OVOL1   | 5017   | -1.10 | 7.77 | -16.23 | 4.07E-28 | 8.39E-26 | 53.55 | 1.00 | 7.78  | 1.93 | 0.96 | 0.96 | 0.97 |
| 229649_at   | NRXN3   | 9369   | -1.87 | 7.94 | -9.14  | 2.26E-14 | 3.23E-13 | 22.09 | 0.92 | 7.56  | 1.78 | 0.90 | 0.98 | 0.81 |
| 229797_at   | MCOLN3  | 55283  | 2.44  | 7.97 | 15.90  | 1.54E-27 | 2.81E-25 | 52.23 | 0.99 | 8.13  | 1.98 | 0.99 | 1.00 | 0.98 |
| 229831_at   | CNTN3   | 5067   | -2.44 | 7.55 | -14.12 | 2.79E-24 | 2.47E-22 | 44.78 | 0.98 | 7.91  | 1.87 | 0.93 | 0.89 | 0.97 |
| 229860_x_at | C4orf48 | 401115 | -1.28 | 7.92 | -8.98  | 4.64E-14 | 6.36E-13 | 21.38 | 0.91 | 7.75  | 1.85 | 0.93 | 0.94 | 0.92 |
| 230110_at   | MCOLN2  | 255231 | 2.49  | 6.84 | 15.75  | 2.87E-27 | 4.80E-25 | 51.61 | 0.97 | 6.97  | 1.90 | 0.95 | 0.92 | 0.98 |
| 230174_at   | LYPLAL1 | 127018 | 1.04  | 9.78 | 14.22  | 1.86E-24 | 1.73E-22 | 45.18 | 0.99 | 9.99  | 1.90 | 0.95 | 0.92 | 0.98 |
| 230237_at   | ADCYAP1 | 116    | -1.13 | 5.88 | -10.97 | 4.03E-18 | 1.10E-16 | 30.67 | 0.98 | 5.53  | 1.90 | 0.95 | 0.98 | 0.92 |
| 230560_at   | STXBP6  | 29091  | -2.82 | 7.18 | -13.62 | 2.50E-23 | 1.77E-21 | 42.60 | 0.98 | 6.41  | 1.89 | 0.95 | 1.00 | 0.89 |
| 230644_at   | LRFN5   | 145581 | -2.02 | 6.36 | -13.24 | 1.35E-22 | 8.27E-21 | 40.92 | 0.97 | 6.31  | 1.94 | 0.96 | 0.94 | 1.00 |
| 230883_at   | NXPH2   | 11249  | 1.79  | 6.18 | 12.07  | 2.56E-20 | 1.00E-18 | 35.70 | 0.96 | 6.03  | 1.80 | 0.89 | 0.97 | 0.83 |
| 231867_at   | TENM2   | 57451  | 2.03  | 6.20 | 15.86  | 1.79E-27 | 3.23E-25 | 52.08 | 0.99 | 6.24  | 1.96 | 0.98 | 1.00 | 0.96 |
| 233183_at   | SLC4A9  | 83697  | 1.75  | 7.97 | 13.46  | 4.90E-23 | 3.28E-21 | 41.93 | 0.98 | 8.22  | 1.86 | 0.94 | 0.86 | 1.00 |
| 233642_s_at | HEATR5B | 54497  | 1.03  | 7.88 | 15.96  | 1.20E-27 | 2.27E-25 | 52.48 | 1.00 | 7.92  | 1.96 | 0.98 | 1.00 | 0.96 |
| 234970_at   | TC2N    | 123036 | -1.20 | 5.61 | -12.20 | 1.41E-20 | 5.67E-19 | 36.30 | 0.96 | 5.74  | 1.82 | 0.90 | 0.87 | 0.94 |
| 235046_at   | INPP4B  | 8821   | -2.20 | 7.21 | -10.16 | 1.84E-16 | 3.75E-15 | 26.87 | 0.93 | 6.86  | 1.74 | 0.88 | 0.96 | 0.78 |
| 235198_at   | OSTM1   | 28962  | 1.03  | 6.29 | 14.85  | 1.25E-25 | 1.41E-23 | 47.87 | 0.98 | 6.29  | 1.91 | 0.95 | 0.97 | 0.94 |
| 236356_at   | NDUFS1  | 4719   | 1.15  | 9.05 | 17.32  | 5.24E-30 | 1.76E-27 | 57.87 | 0.99 | 9.18  | 1.97 | 0.99 | 0.97 | 1.00 |
| 236489_at   | ADGRF1  | 266977 | 1.43  | 6.58 | 11.50  | 3.55E-19 | 1.14E-17 | 33.09 | 0.95 | 6.50  | 1.76 | 0.87 | 0.97 | 0.79 |
| 238513_at   | PRRG4   | 79056  | -1.16 | 7.50 | -12.55 | 2.90E-21 | 1.37E-19 | 37.87 | 0.98 | 7.51  | 1.84 | 0.92 | 0.87 | 0.97 |
| 238763_at   | RBM20   | 282996 | 1.39  | 5.45 | 10.00  | 3.81E-16 | 7.36E-15 | 26.15 | 0.95 | 5.23  | 1.79 | 0.89 | 0.92 | 0.87 |
| 238815_at   | LRRTM1  | 347730 | -1.28 | 7.02 | -9.41  | 6.30E-15 | 9.83E-14 | 23.36 | 0.95 | 6.68  | 1.83 | 0.92 | 0.94 | 0.89 |
| 238865_at   | PABPC4L | 132430 | -1.85 | 7.28 | -16.28 | 3.27E-28 | 6.92E-26 | 53.77 | 0.99 | 7.36  | 1.98 | 0.99 | 0.98 | 1.00 |
| 239183_at   | ANGPTL1 | 9068   | 1.06  | 6.22 | 8.35   | 9.07E-13 | 1.01E-11 | 18.43 | 0.90 | 6.10  | 1.66 | 0.82 | 0.92 | 0.74 |
| 240117_at   | FBN3    | 84467  | -1.14 | 7.22 | -8.51  | 4.35E-13 | 5.12E-12 | 19.16 | 0.91 | 7.25  | 1.68 | 0.83 | 0.79 | 0.89 |

|           |       |        |       |      |        |          |          |       |      |      |      |      |      |      |
|-----------|-------|--------|-------|------|--------|----------|----------|-------|------|------|------|------|------|------|
| 240395_at | DGKI  | 9162   | -1.39 | 6.44 | -7.59  | 3.21E-11 | 2.80E-10 | 14.90 | 0.91 | 6.17 | 1.75 | 0.87 | 0.81 | 0.94 |
| 241859_at | PLCL1 | 5334   | 1.77  | 8.33 | 11.98  | 3.91E-20 | 1.48E-18 | 35.28 | 0.95 | 8.52 | 1.92 | 0.96 | 0.94 | 0.98 |
| 243087_at | DNAI3 | 126820 | 1.16  | 5.25 | 12.44  | 4.78E-21 | 2.14E-19 | 37.37 | 0.97 | 5.23 | 1.88 | 0.94 | 0.94 | 0.94 |
| 65517_at  | AP1M2 | 10053  | -1.49 | 8.84 | -17.31 | 5.33E-30 | 1.76E-27 | 57.85 | 1.00 | 8.87 | 1.96 | 0.98 | 0.96 | 1.00 |

---

**Table S3:** Reactome Pathway analysis between chRCC and RO using all genes (n = 15,875)

| Reactome pathways | Description                                                                      | GeneRatio | p.adjust | qvalue   | Count |
|-------------------|----------------------------------------------------------------------------------|-----------|----------|----------|-------|
| R-HSA-71387       | Metabolism of carbohydrates                                                      | 282/9216  | 5.93E-07 | 3.58E-07 | 282   |
| R-HSA-3700989     | Transcriptional Regulation by TP53                                               | 341/9216  | 3.18E-05 | 1.92E-05 | 341   |
| R-HSA-76002       | Platelet activation, signaling and aggregation                                   | 248/9216  | 7.74E-05 | 4.67E-05 | 248   |
| R-HSA-5663202     | Diseases of signal transduction by growth factor receptors and second messengers | 366/9216  | 7.74E-05 | 4.67E-05 | 366   |
| R-HSA-112316      | Neuronal System                                                                  | 378/9216  | 1.81E-04 | 1.09E-04 | 378   |
| R-HSA-397014      | Muscle contraction                                                               | 187/9216  | 2.63E-04 | 1.59E-04 | 187   |
| R-HSA-1630316     | Glycosaminoglycan metabolism                                                     | 120/9216  | 4.98E-04 | 3.00E-04 | 120   |
| R-HSA-1474244     | Extracellular matrix organization                                                | 279/9216  | 6.40E-04 | 3.86E-04 | 279   |
| R-HSA-6785807     | Interleukin-4 and Interleukin-13 signaling                                       | 105/9216  | 6.40E-04 | 3.86E-04 | 105   |
| R-HSA-3858494     | Beta-catenin independent WNT signaling                                           | 139/9216  | 1.55E-03 | 9.33E-04 | 139   |
| R-HSA-72172       | mRNA Splicing                                                                    | 179/9216  | 2.29E-03 | 1.38E-03 | 179   |
| R-HSA-5357801     | Programmed Cell Death                                                            | 196/9216  | 2.29E-03 | 1.38E-03 | 196   |
| R-HSA-400206      | Regulation of lipid metabolism by PPAR-alpha                                     | 114/9216  | 2.29E-03 | 1.38E-03 | 114   |
| R-HSA-5576891     | Cardiac conduction                                                               | 123/9216  | 2.36E-03 | 1.43E-03 | 123   |
| R-HSA-1989781     | PPARA activates gene expression                                                  | 112/9216  | 2.45E-03 | 1.48E-03 | 112   |
| R-HSA-6798695     | Neutrophil degranulation                                                         | 434/9216  | 2.45E-03 | 1.48E-03 | 434   |
| R-HSA-72163       | mRNA Splicing - Major Pathway                                                    | 171/9216  | 3.69E-03 | 2.23E-03 | 171   |
| R-HSA-1852241     | Organelle biogenesis and maintenance                                             | 271/9216  | 4.24E-03 | 2.56E-03 | 271   |
| R-HSA-112315      | Transmission across Chemical Synapses                                            | 248/9216  | 4.24E-03 | 2.56E-03 | 248   |
| R-HSA-109581      | Apoptosis                                                                        | 168/9216  | 4.24E-03 | 2.56E-03 | 168   |
| R-HSA-8951664     | Neddylation                                                                      | 216/9216  | 4.28E-03 | 2.58E-03 | 216   |
| R-HSA-5633007     | Regulation of TP53 Activity                                                      | 150/9216  | 4.28E-03 | 2.58E-03 | 150   |
| R-HSA-9006925     | Intracellular signaling by second messengers                                     | 282/9216  | 4.90E-03 | 2.96E-03 | 282   |
| R-HSA-449147      | Signaling by Interleukins                                                        | 416/9216  | 5.48E-03 | 3.30E-03 | 416   |
| R-HSA-72203       | Processing of Capped Intron-Containing Pre-mRNA                                  | 224/9216  | 6.92E-03 | 4.17E-03 | 224   |
| R-HSA-196854      | Metabolism of vitamins and cofactors                                             | 176/9216  | 7.06E-03 | 4.26E-03 | 176   |
| R-HSA-76005       | Response to elevated platelet cytosolic Ca <sup>2+</sup>                         | 126/9216  | 7.06E-03 | 4.26E-03 | 126   |
| R-HSA-425407      | SLC-mediated transmembrane transport                                             | 230/9216  | 7.06E-03 | 4.26E-03 | 230   |
| R-HSA-9006936     | Signaling by TGFB family members                                                 | 97/9216   | 8.14E-03 | 4.91E-03 | 97    |
| R-HSA-73887       | Death Receptor Signaling                                                         | 132/9216  | 8.37E-03 | 5.05E-03 | 132   |
| R-HSA-446203      | Asparagine N-linked glycosylation                                                | 276/9216  | 9.97E-03 | 6.02E-03 | 276   |
| R-HSA-114608      | Platelet degranulation                                                           | 121/9216  | 0.01     | 6.12E-03 | 121   |
| R-HSA-163685      | Integration of energy metabolism                                                 | 102/9216  | 0.011    | 6.93E-03 | 102   |
| R-HSA-8856828     | Clathrin-mediated endocytosis                                                    | 136/9216  | 0.011    | 6.93E-03 | 136   |
| R-HSA-1257604     | PIP3 activates AKT signaling                                                     | 243/9216  | 0.012    | 7.12E-03 | 243   |
| R-HSA-416476      | G alpha (q) signaling events                                                     | 198/9216  | 0.012    | 7.12E-03 | 198   |
| R-HSA-166520      | Signaling by NTRKs                                                               | 125/9216  | 0.013    | 0.0081   | 125   |
| R-HSA-2454202     | Fc epsilon receptor (FCERI) signaling                                            | 125/9216  | 0.013    | 0.0081   | 125   |
| R-HSA-9658195     | Leishmania infection                                                             | 231/9216  | 0.015    | 0.0091   | 231   |
| R-HSA-983168      | Antigen processing: Ubiquitination & Proteasome degradation                      | 279/9216  | 0.016    | 0.0095   | 279   |
| R-HSA-9012999     | RHO GTPase cycle                                                                 | 396/9216  | 0.016    | 0.0095   | 396   |
| R-HSA-5683057     | MAPK family signaling cascades                                                   | 293/9216  | 0.016    | 0.0095   | 293   |
| R-HSA-453279      | Mitotic G1 phase and G1/S transition                                             | 138/9216  | 0.016    | 0.0095   | 138   |

|               |                                                                                                                             |          |       |        |     |
|---------------|-----------------------------------------------------------------------------------------------------------------------------|----------|-------|--------|-----|
| R-HSA-5358351 | Signaling by Hedgehog                                                                                                       | 138/9216 | 0.016 | 0.0095 | 138 |
| R-HSA-983705  | Signaling by the B Cell Receptor (BCR)                                                                                      | 105/9216 | 0.016 | 0.0095 | 105 |
| R-HSA-162906  | HIV Infection                                                                                                               | 213/9216 | 0.017 | 0.01   | 213 |
| R-HSA-1500931 | Cell-Cell communication                                                                                                     | 120/9216 | 0.017 | 0.011  | 120 |
| R-HSA-9679506 | SARS-CoV Infections                                                                                                         | 136/9216 | 0.017 | 0.011  | 136 |
| R-HSA-983169  | Class I MHC mediated antigen processing & presentation                                                                      | 338/9216 | 0.017 | 0.011  | 338 |
| R-HSA-9013149 | RAC1 GTPase cycle                                                                                                           | 169/9216 | 0.026 | 0.016  | 169 |
| R-HSA-948021  | Transport to the Golgi and subsequent modification                                                                          | 169/9216 | 0.026 | 0.016  | 169 |
| R-HSA-187037  | Signaling by NTRK1 (TRKA)                                                                                                   | 107/9216 | 0.026 | 0.016  | 107 |
| R-HSA-5617833 | Cilium Assembly                                                                                                             | 183/9216 | 0.027 | 0.016  | 183 |
| R-HSA-196849  | Metabolism of water-soluble vitamins and cofactors                                                                          | 114/9216 | 0.028 | 0.017  | 114 |
| R-HSA-1474228 | Degradation of the extracellular matrix                                                                                     | 129/9216 | 0.028 | 0.017  | 129 |
| R-HSA-6807070 | PTEN Regulation                                                                                                             | 129/9216 | 0.028 | 0.017  | 129 |
| R-HSA-418594  | G alpha (i) signaling events                                                                                                | 285/9216 | 0.031 | 0.018  | 285 |
| R-HSA-1296071 | Potassium Channels                                                                                                          | 96/9216  | 0.031 | 0.018  | 96  |
| R-HSA-8878166 | Transcriptional regulation by RUNX2                                                                                         | 112/9216 | 0.031 | 0.018  | 112 |
| R-HSA-500792  | GPCR ligand binding                                                                                                         | 414/9216 | 0.037 | 0.022  | 414 |
| R-HSA-983712  | Ion channel transport                                                                                                       | 169/9216 | 0.039 | 0.023  | 169 |
| R-HSA-8957322 | Metabolism of steroids                                                                                                      | 138/9216 | 0.043 | 0.026  | 138 |
| R-HSA-381426  | Regulation of Insulin-like Growth Factor (IGF) transport and uptake by Insulin-like Growth Factor Binding Proteins (IGFBPs) | 115/9216 | 0.044 | 0.027  | 115 |
| R-HSA-5619115 | Disorders of transmembrane transporters                                                                                     | 159/9216 | 0.045 | 0.027  | 159 |
| R-HSA-72306   | tRNA processing                                                                                                             | 99/9216  | 0.045 | 0.027  | 99  |
| R-HSA-5684996 | MAPK1/MAPK3 signaling                                                                                                       | 256/9216 | 0.046 | 0.028  | 256 |
| R-HSA-8856825 | Cargo recognition for clathrin-mediated endocytosis                                                                         | 98/9216  | 0.048 | 0.029  | 98  |



**Table S5:** KEGG pathway analysis of genes (n = 15,875) between RO and Normal Kidney

| ID       | Description                                       | setSize | enrichmentSc | NES        | pvalue     | p.adjust   | qvalues    | rank |
|----------|---------------------------------------------------|---------|--------------|------------|------------|------------|------------|------|
| hsa00190 | Oxidative phosphorylation                         | 112     | 0.71450272   | 2.79627759 | 1.73E-19   | 3.74E-17   | 2.90E-17   | 2850 |
| hsa04714 | Thermogenesis                                     | 204     | 0.52918591   | 2.2126015  | 1.26E-12   | 1.36E-10   | 1.05E-10   | 2672 |
| hsa04932 | Non-alcoholic fatty liver disease                 | 143     | 0.50531716   | 2.01419525 | 4.99E-08   | 3.59E-06   | 2.78E-06   | 2626 |
| hsa04610 | Complement and coagulation cascades               | 73      | -0.6696888   | -1.9819239 | 1.92E-06   | 8.74E-05   | 6.77E-05   | 1590 |
| hsa05418 | Fluid shear stress and atherosclerosis            | 125     | -0.5910539   | -1.8912175 | 2.02E-06   | 8.74E-05   | 6.77E-05   | 3216 |
| hsa05415 | Diabetic cardiomyopathy                           | 177     | 0.42852604   | 1.76720808 | 3.40E-06   | 1.22E-04   | 9.47E-05   | 2850 |
| hsa04020 | Calcium signaling pathway                         | 226     | 0.39633067   | 1.69038892 | 6.52E-06   | 2.01E-04   | 1.56E-04   | 1040 |
| hsa05010 | Alzheimer disease                                 | 330     | 0.34873166   | 1.53068077 | 1.23E-05   | 3.21E-04   | 2.49E-04   | 2850 |
| hsa04978 | Mineral absorption                                | 53      | -0.7001771   | -1.9929178 | 1.37E-05   | 3.21E-04   | 2.49E-04   | 1936 |
| hsa04974 | Protein digestion and absorption                  | 90      | -0.605544    | -1.8521446 | 1.57E-05   | 3.21E-04   | 2.49E-04   | 1936 |
| hsa04514 | Cell adhesion molecules                           | 124     | -0.565881    | -1.8120234 | 1.63E-05   | 3.21E-04   | 2.49E-04   | 2492 |
| hsa05150 | Staphylococcus aureus infection                   | 66      | -0.6381053   | -1.8666056 | 3.40E-05   | 6.12E-04   | 4.74E-04   | 1571 |
| hsa05016 | Huntington disease                                | 265     | 0.35487518   | 1.52776849 | 4.32E-05   | 7.17E-04   | 5.56E-04   | 3277 |
| hsa04670 | Leukocyte transendothelial migration              | 99      | -0.586234    | -1.8161851 | 4.82E-05   | 7.44E-04   | 5.76E-04   | 3216 |
| hsa05014 | Amyotrophic lateral sclerosis                     | 313     | 0.33578125   | 1.47830791 | 5.64E-05   | 8.13E-04   | 6.30E-04   | 2672 |
| hsa05012 | Parkinson disease                                 | 216     | 0.37728942   | 1.60530172 | 6.81E-05   | 9.20E-04   | 7.13E-04   | 2342 |
| hsa05322 | Systemic lupus erythematosus                      | 81      | -0.5991339   | -1.8074699 | 7.65E-05   | 9.73E-04   | 7.54E-04   | 1088 |
| hsa00980 | Metabolism of xenobiotics by cytochrome P450      | 51      | -0.6661358   | -1.879733  | 8.41E-05   | 0.00100946 | 7.82E-04   | 1013 |
| hsa04668 | TNF signaling pathway                             | 106     | -0.5701657   | -1.7890246 | 9.01E-05   | 0.00102416 | 7.94E-04   | 2719 |
| hsa05133 | Pertussis                                         | 68      | -0.6210587   | -1.8268115 | 1.19E-04   | 0.00128167 | 9.93E-04   | 2405 |
| hsa05130 | Pathogenic Escherichia coli infection             | 173     | -0.5136957   | -1.6978514 | 1.32E-04   | 0.0013569  | 0.0010514  | 3074 |
| hsa04512 | ECM-receptor interaction                          | 82      | -0.58691     | -1.7713702 | 1.76E-04   | 0.00173003 | 0.00134052 | 1956 |
| hsa05022 | Pathways of neurodegeneration - multiple diseases | 423     | 0.28996118   | 1.29488092 | 4.93E-04   | 0.00451916 | 0.00350169 | 2850 |
| hsa05020 | Prion disease                                     | 239     | 0.3423339    | 1.47722924 | 5.02E-04   | 0.00451916 | 0.00350169 | 2851 |
| hsa04723 | Retrograde endocannabinoid signaling              | 133     | 0.39492796   | 1.5839345  | 5.41E-04   | 0.00459413 | 0.00355978 | 2586 |
| hsa00983 | Drug metabolism - other enzymes                   | 55      | -0.6149623   | -1.7588473 | 5.53E-04   | 0.00459413 | 0.00355978 | 1685 |
| hsa04721 | Synaptic vesicle cycle                            | 73      | 0.47141536   | 1.73755962 | 9.81E-04   | 0.0078458  | 0.00607935 | 785  |
| hsa05231 | Choline metabolism in cancer                      | 91      | -0.5378764   | -1.6471865 | 0.00122009 | 0.00941211 | 0.00729301 | 1945 |
| hsa04976 | Bile secretion                                    | 74      | -0.5440012   | -1.6189053 | 0.00157244 | 0.01171195 | 0.00907505 | 662  |
| hsa00010 | Glycolysis / Gluconeogenesis                      | 64      | -0.579041    | -1.6928824 | 0.00164232 | 0.01182473 | 0.00916243 | 2038 |
| hsa05145 | Toxoplasmosis                                     | 100     | -0.5116571   | -1.58819   | 0.00207129 | 0.01443222 | 0.01118286 | 3131 |
| hsa04740 | Olfactory transduction                            | 108     | 0.39372511   | 1.5280235  | 0.00228074 | 0.015395   | 0.01192888 | 3473 |
| hsa01230 | Biosynthesis of amino acids                       | 66      | -0.5522244   | -1.6153843 | 0.00261843 | 0.01713881 | 0.01328007 | 1237 |
| hsa04146 | Peroxisome                                        | 76      | -0.524959    | -1.571039  | 0.00340743 | 0.0216472  | 0.01677342 | 2316 |
| hsa05171 | Coronavirus disease - COVID-19                    | 170     | -0.4640824   | -1.5308589 | 0.00376237 | 0.02321917 | 0.01799147 | 2946 |

|          |                         |     |            |            |            |            |            |      |
|----------|-------------------------|-----|------------|------------|------------|------------|------------|------|
| hsa04530 | Tight junction          | 152 | -0.4645904 | -1.5206929 | 0.00459955 | 0.02759728 | 0.02138386 | 2963 |
| hsa05160 | Hepatitis C             | 139 | -0.4696928 | -1.5173356 | 0.00546441 | 0.03190033 | 0.02471809 | 3236 |
| hsa04657 | IL-17 signaling pathway | 87  | -0.5238416 | -1.5963681 | 0.00570132 | 0.03240751 | 0.02511108 | 3272 |
| hsa03320 | PPAR signaling pathway  | 69  | -0.5267584 | -1.5494107 | 0.00659022 | 0.03649968 | 0.02828191 | 2436 |
| hsa00561 | Glycerolipid metabolism | 56  | -0.5553908 | -1.5872777 | 0.00733531 | 0.0396107  | 0.0306925  | 3010 |
| hsa04510 | Focal adhesion          | 188 | -0.4219662 | -1.4122021 | 0.00908993 | 0.0478884  | 0.03710651 | 1873 |

---

**Table S4:** KEGG pathway analysis of genes (n=15875) between chRCC and normal kidney.

| ID       | Description                                  | setSize | enrichmentSc | NES  | pvalue     | p.adjust   | qvalues    | rank |
|----------|----------------------------------------------|---------|--------------|------|------------|------------|------------|------|
| hsa04974 | Protein digestion and absorption             | 90      | -0.7         | -2.1 | 1.77E-08   | 3.82E-06   | 3.35E-06   | 2063 |
| hsa04610 | Complement and coagulation cascades          | 73      | -0.7         | -2.1 | 8.20E-08   | 8.86E-06   | 7.77E-06   | 874  |
| hsa04146 | Peroxisome                                   | 76      | -0.6         | -2.0 | 4.51E-06   | 2.70E-04   | 2.37E-04   | 1766 |
| hsa00190 | Oxidative phosphorylation                    | 112     | 0.5          | 2.0  | 5.00E-06   | 2.70E-04   | 2.37E-04   | 2156 |
| hsa00980 | Metabolism of xenobiotics by cytochrome P450 | 51      | -0.7         | -2.0 | 1.04E-05   | 4.49E-04   | 3.94E-04   | 1546 |
| hsa00010 | Glycolysis / Gluconeogenesis                 | 64      | -0.6         | -2.0 | 1.91E-05   | 6.88E-04   | 6.03E-04   | 1546 |
| hsa03320 | PPAR signaling pathway                       | 69      | -0.6         | -1.9 | 1.08E-04   | 0.00332406 | 0.00291584 | 1182 |
| hsa01200 | Carbon metabolism                            | 109     | -0.5         | -1.7 | 1.93E-04   | 0.00522253 | 0.00458116 | 1884 |
| hsa05418 | Fluid shear stress and atherosclerosis       | 125     | -0.5         | -1.6 | 4.53E-04   | 0.01019494 | 0.00894293 | 2680 |
| hsa00983 | Drug metabolism - other enzymes              | 55      | -0.6         | -1.8 | 4.72E-04   | 0.01019494 | 0.00894293 | 426  |
| hsa05206 | MicroRNAs in cancer                          | 155     | -0.5         | -1.6 | 6.72E-04   | 0.01318604 | 0.0115667  | 2751 |
| hsa04978 | Mineral absorption                           | 53      | -0.6         | -1.8 | 0.00118607 | 0.02134929 | 0.01872744 | 2781 |
| hsa01240 | Biosynthesis of cofactors                    | 126     | -0.5         | -1.5 | 0.00163406 | 0.02715053 | 0.02381626 | 3240 |
| hsa04976 | Bile secretion                               | 74      | -0.5         | -1.7 | 0.00225048 | 0.03386365 | 0.02970496 | 1824 |
| hsa04932 | Non-alcoholic fatty liver disease            | 143     | 0.4          | 1.5  | 0.00235164 | 0.03386365 | 0.02970496 | 2156 |
| hsa04512 | ECM-receptor interaction                     | 82      | -0.5         | -1.7 | 0.00282432 | 0.0381283  | 0.03344588 | 2074 |
| hsa05323 | Rheumatoid arthritis                         | 77      | 0.4          | 1.6  | 0.0034201  | 0.04119485 | 0.03613583 | 1677 |
| hsa01230 | Biosynthesis of amino acids                  | 66      | -0.5         | -1.7 | 0.0034329  | 0.04119485 | 0.03613583 | 1377 |
| hsa04070 | Phosphatidylinositol signaling system        | 96      | 0.4          | 1.6  | 0.00391509 | 0.04450842 | 0.03904247 | 2127 |

## Material

### 1.1 Figure Ss

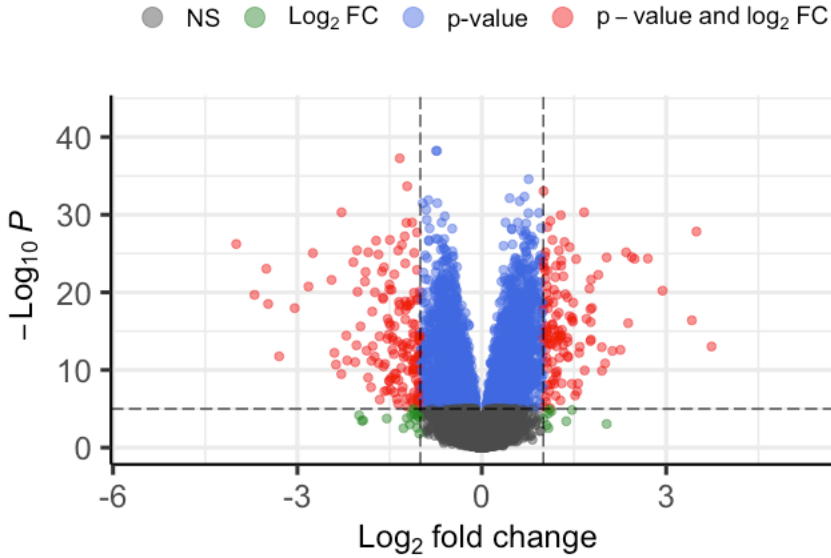

**Figure S1:** Differential expression analysis between chRCC and RO tumor types using 15875 genes. Differential expression was performed on log<sub>2</sub> transformed data using LIMMA package in R. cutoffs for p-value (horizontal line) is 1e<sup>-5</sup> and log<sub>2</sub> fold change (vertical lines) is 1. Genes marked with red color represent candidate markers for gene signature based on differential expression.

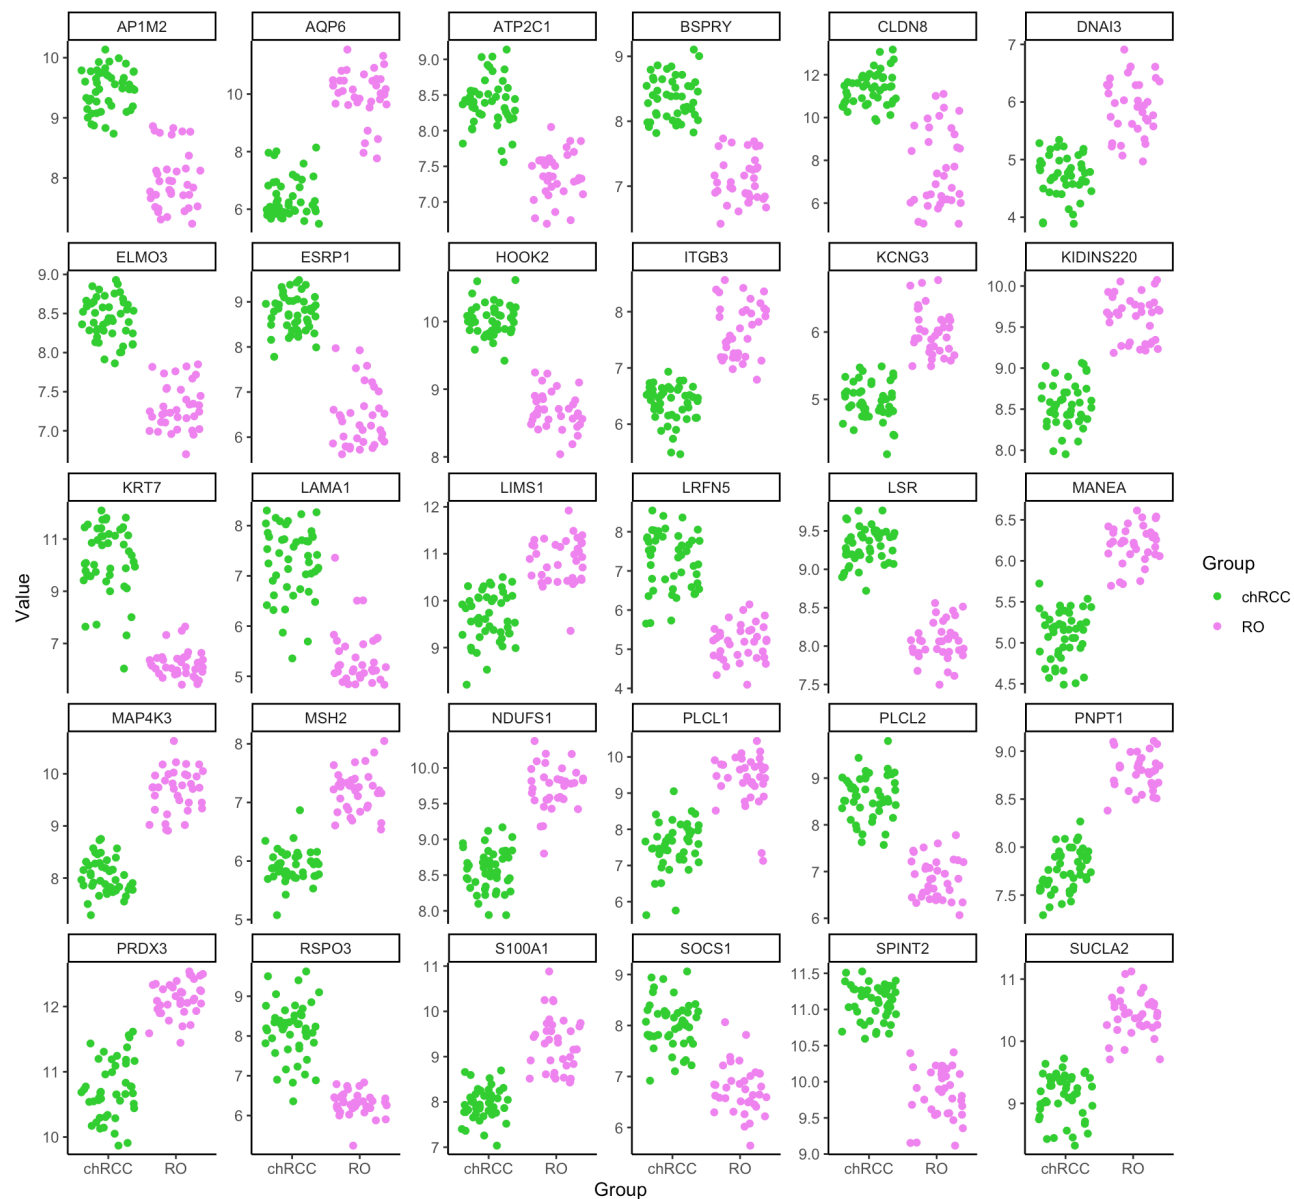

**Figure S2:** Dot plots for each gene in COGS for classification in chRCC (green dots) and renal oncocytoma (magenta dots). X-axes represent histology and y-axes represents Log2 expression.

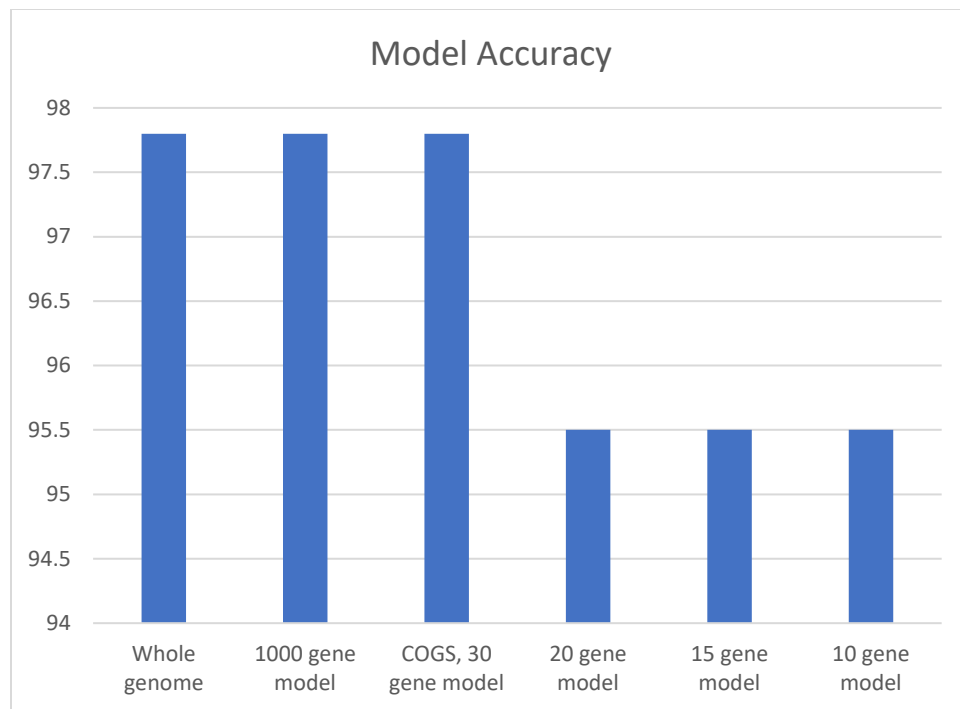

**Figure S3:** Model performance from whole genome to 10 gene model. Accuracy was checked with density based UMAP classification.

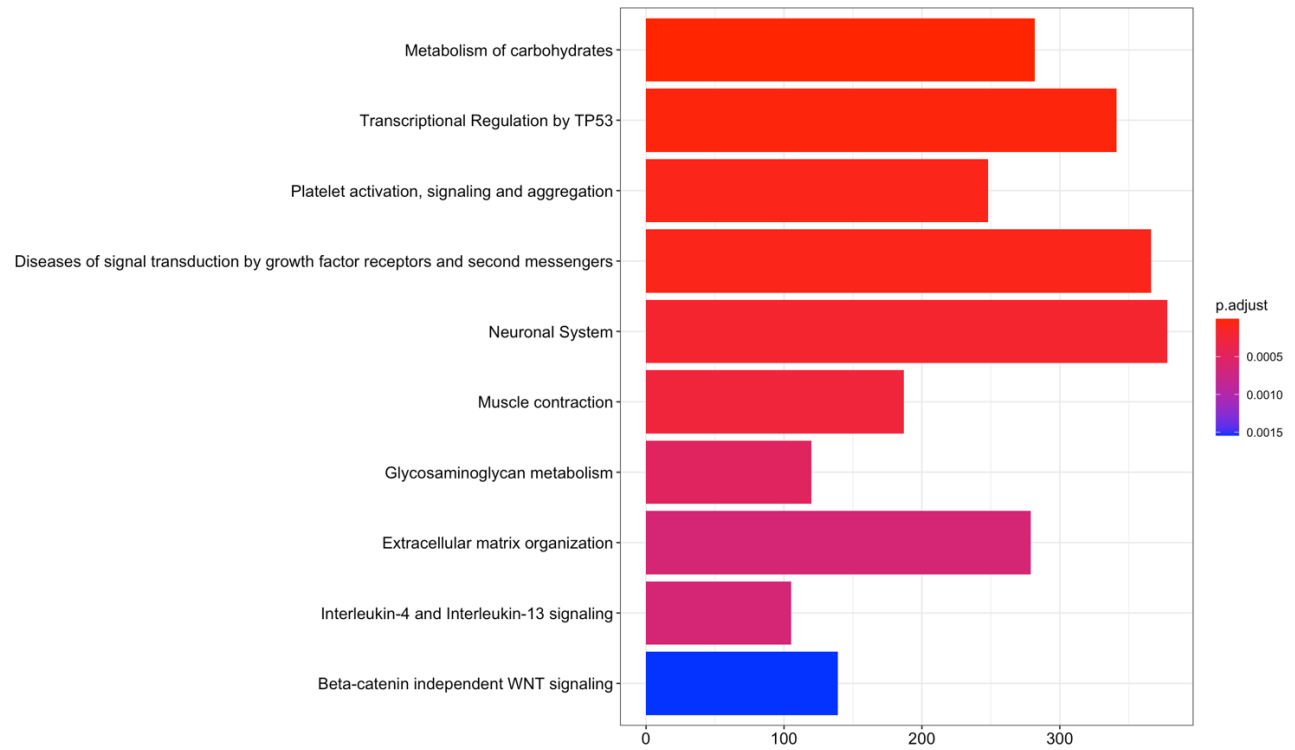

**Figure S4:** Reactome pathways analysis between chRCC and RO for all genes (15,875 genes) showing enrichment of specific pathways. X-axes represents number of genes present in each pathway.

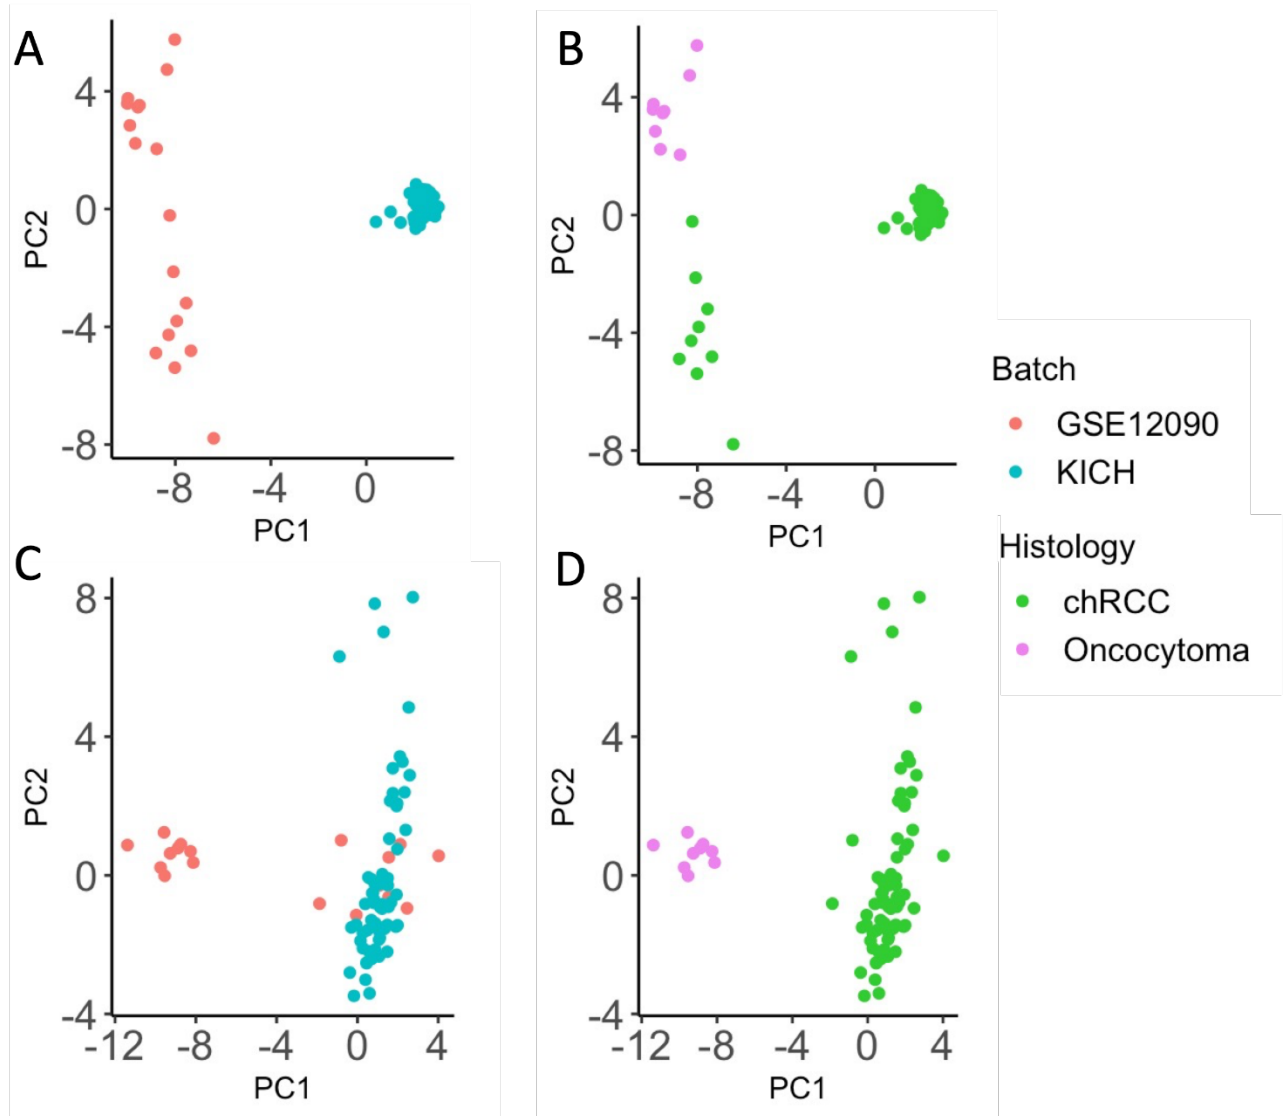

**Figure S5:** Principal component analysis showing batch effects (A-B) and after correction (C-D) on the validation dataset.
